# Supplementary material
Source: PubMed Central journal article supplement (PMC2916958)
Supplement: NIHMS194498-supplement-2.pdf [file NIHMS194498-supplement-2.pdf]

**Supplementary Table 1:**

| Gene Name | Protein Accession | Nucleotide Accession | First primer Forward   | First primer Backward  |
|-----------|-------------------|----------------------|------------------------|------------------------|
| SYTL1     | NP_116261         | NM_032872            | aagtggaagtgcccctggac   | gttggtctgaggggtagaag   |
| CYBB      | NP_000388         | NM_000397            | aagcaggagtttcaagatgcg  | gaaaatgaaatgcactccccg  |
| NCF1      | NP_000256         | NM_000265            | ggttgggtgtctgcagatg    | agcttccgcttgggtctctc   |
| CYBA      | NP_000092         | NM_000101            | cagatcgagtgggccatgtg   | tcacacgacctcgctcggtc   |
| LOC401374 | XP_376628         | XM_376628            | ggttgggtgtctgcagatg    | agcttccgcttgggtctctc   |
| NOXO1     | NP_751907         | NM_172167            | ataggcctttcagggcgag    | acagagtgccacgcaccctc   |
| LOC283247 | XP_208058         | XM_208058            | taccctcacaatgtgtccaac  | ctcgtcccatatgagttgttc  |
| DUOX2     | NP_054799         | NM_014080            | tgtgtggatacccaagctg    | cagaagttctatagttgtgc   |
| RUFY1     | NP_079434         | NM_025158            | acaagctgcagcaggagctg   | tgtgagcagctgacacac     |
| DUOX1     | NP_059130         | NM_017434            | ggtagcagatgtgccagatac  | ctcataatgggtgggagaagtg |
| NOX5      | NP_078781         | NM_024505            | ggatcttgcctctgagcatg   | atctgaagccgaactctcac   |
| NOX3      | NP_056533         | NM_015718            | tggacgggcccttggaaac    | tagaaatgaacacctctgggg  |
| ARHGDIB   | NP_001166         | NM_001175            | aaaaagccccagagccacatg  | ctgtccactccttctaatcg   |
| NOX4      | NP_058627         | NM_016931            | tcgagatttactactgcctcc  | gtcccatatgagttgtctgg   |
| ARHGDI2   | NP_004300         | NM_004309            | gatgagcactcggtcaactac  | cagtcctccagctcctcttg   |
| NOXA1     | NP_006638         | NM_006647            | gtgctgggggagcagggtg    | tagggctgatcctcctctg    |
| NOX1      | NP_008983         | NM_007052            | caccaattcccaggattgaag  | gaaccttctaggatccagac   |
| PRDX2     | NP_859428         | NM_181738            | gtaacgcgcgcatcggaaaag  | tcactctaaagacttgggag   |
| PRDX2     | NP_859427         | NM_181737            | gtaacgcgcgcatcggaaaag  | tattccttgcctcatccacg   |
| PRDX1     | NP_859048         | NM_181697            | atgctaaaattgggcaccctg  | ttgctctttggacatcaggc   |
| PRDX1     | NP_859047         | NM_181696            | atgctaaaattgggcaccctg  | ttgctctttggacatcaggc   |
| PRDX5     | NP_857635         | NM_181652            | tcagcgggctataactctgct  | gagcttgagatgatattggg   |
| PRDX3     | AAH59169          | BC059169             | gcatgcaccctatcttaagg   | agtactcttggagcagctg    |
| PRDX4     | AAH03609          | BC003609             | ctgcacctaaagcaagcgaag  | atacttcagcttccagctgg   |
| TXN2      | NP_036605         | NM_012473            | atggctcagcgacttctctg   | tcagccaatcagcttctcag   |
| TXNRD2    | NP_006431         | NM_006440            | atttggagaaggctggggtag  | ttggagatgagcagcttgac   |
| TXNRD2    | NP_665691         | NM_145748            | atttggagaaggctggggtag  | ttggagatgagcagcttgac   |
| TXN       | NP_003320         | NM_003329            | atggtagagcagatcgagagc  | atggtagagcagcttgac     |
| TXNRD1    | NP_877393         | NM_182729            | ttgaaaccgtaggggtgaag   | agcgttggatcacagacaatg  |
| TXNL2     | NP_006532         | NM_006541            | agaaattgactcatgctgcc   | ttctcctcagataggcag     |
| TXNL1     | NP_004777         | NM_004786            | tatcaaggagcagatgctgtg  | gtggcttctctttttgccc    |
| TXNDC9    | NP_005774         | NM_005783            | aactggatcagatggatgagg  | tcctcggatgcttctttcc    |
| TXNDC     | NP_110382         | NM_030755            | aagtagatgtcacagagcagc  | tatctgtggccaatgatggac  |
| TXNDC3    | NP_057700         | NM_016616            | gacaattgcttccaactctg   | ttcctcaggatcctcaaagag  |
| TXNDC2    | NP_115619         | NM_032243            | aagaagggtgacatcccccaag | caagttttccttaagggcgc   |
| PTGES2    | NP_945177         | NM_198939            | gctgtggcctgtgggtg      | aggatgggcaccttctgtag   |
| TXNRD3    | XP_051264         | XM_051264            | taggctgtgagaagattgggtg | cagcagccttctgagtgatg   |
| PRDX5     | NP_857634         | NM_181651            | tcagcgggctataactctgct  | gagcttgagatgatattggg   |
| GLRX2     | NP_057150         | NM_016066            | tgaaccctcagagataagcaag | acaactgatgaaactagtgagg |
| PRDX5     | NP_036226         | NM_012094            | agcaagacggtgagtggaag   | gagcttgagatgatattggg   |
| TXNL2     | NP_006532         | NM_006541            | agaaattgactcatgctgcc   | ttctcctcagataggcag     |
| GLRX      | NP_002055         | NM_002064            | ggctcaagagtttgaactg    | ttactgcagagctccaactg   |
| LOC392531 | XP_373367         | XM_373367            | ttgtaatacaagtcgggacgg  | ttactctaaaagggcggagtg  |
| LOC389207 | XP_371694         | XM_371694            | aggatagcttctggtgttag   | accagcagagtttacaaccg   |
| C14orf87  | NP_057501         | NM_016417            | atgagcgggtccctcggc     | cacttggagtctgtcttcc    |
| SH3BGR1   | NP_112576         | NM_031286            | cgaaatcaagtcaccagcagag | tcagccagcttccaggaactc  |
| GLRX2     | NP_932066         | NM_197962            | ggctgttggagcaggag      | acactgatgaactagtgagg   |
| GPX6      | NP_874360         | NM_182701            | agcctcaaaataggagggtgg  | gaactgctttaggtactccag  |
| GPX1      | NP_000572         | NM_000581            | cagtcggtgtatgcttctc    | ttcagatgagcagctcagctg  |
| GPX1      | NP_958799         | NM_201397            | cagtcggtgtatgcttctc    | acctgatgcccacaactggtg  |
| LOC389839 | XP_372197         | XM_372197            | cagtcggtgtatgcttctc    | taggcaacatcgttgcgacac  |
| GPX7      | NP_056511         | NM_015696            | tggctgctctgtgggctg     | aagtcttctgctcagtagg    |
| GPX3      | NP_002075         | NM_002084            | actgcctaggtggcataagtg  | ttactcctctgacccccag    |
| GPX4      | NP_002076         | NM_002085            | gccttgcgcctactgaag     | ctagaaatagtgggcaggctc  |
| GPX2      | AAH67221          | BC067221             | atggcttcatgccaagtcc    | tatggcaacttaaggaggcg   |
| GPX5      | NP_001500         | NM_001509            | cccaagcaggagaagatgaag  | gaattgctcaagtacgccag   |
| GPX7      | AAH32788          | BC032788             | tggctgctctgtgggctg     | aagtcttctgctcagtagg    |
| GPX5      | NP_003987         | NM_003996            | tgactcacagtttaagggtcg  | tcccccttcaaaaagctgg    |
| CAT       | NP_001743         | NM_001752            | gttgaacagatagccttcgac  | acagattgcttctcctctg    |
| LOXHD1    | NP_653213         | NM_144612            | ccatgctgactacgttcaag   | aacaaggtcattgacaagcc   |
| ALOX5AP   | NP_001620         | NM_001629            | actgtaggcaatgtgtcctg   | tagggaatgagaagttagagg  |
| ALOXE3    | NP_067641         | NM_021628            | ggccattgagagcttctctc   | ttagatggagacgctgttctc  |
| ALOX15B   | NP_001132         | NM_001141            | atgcagatttggggtgcagtg  | ttagatggagacgctgttctc  |
| ALOX5     | NP_000689         | NM_000698            | gaggtgtagacatctactac   | atggccactgttcggaatc    |
| ALOX12B   | NP_001130         | NM_001139            | gttggaatgcactggagaag   | atgctgttctcaatcagcacc  |

|          |           |           |                        |                        |
|----------|-----------|-----------|------------------------|------------------------|
| ALOX12   | NP_000688 | NM_000697 | tacggctctgggagatcattg  | tcagatggtgacactgttctc  |
| PTGS2    | NP_000954 | NM_000963 | cattcaccaggcaaatgctg   | ctacagttcagtcgaacgttc  |
| PTGS1    | NP_000953 | NM_000962 | tacagctacgagcagttctg   | tcagagctctgtggatggtc   |
| PTGS1    | NP_542158 | NM_080591 | ttcgggtccagttccaatac   | tcagagctctgtggatggtc   |
| PRKCI    | NP_002731 | NM_002740 | tgtgtaaggaaggattacggc  | cagacacattcttgcagac    |
| PRKQC    | NP_006248 | NM_006257 | gatggacatatcaagatcgcg  | ccggggtcatgaaggaaaag   |
| PRKD3    | NP_005804 | NM_005813 | agccagaaaatgtgctgctg   | gccataatgaagtgcttggg   |
| PRKCH    | NP_006246 | NM_006255 | accacgagggctactgtaaac  | tggttgaattctggagacac   |
| PRKCD    | NP_997704 | NM_212539 | gggatggccacatcaagattg  | tcaatcttccaggagggtctc  |
| PRKCB1   | NP_997700 | NM_212535 | atgctcgattctgagggacac  | ctgggttagataagagaagcc  |
| PRKCD    | NP_006245 | NM_006254 | gggatggccacatcaagattg  | tcaatcttccaggagggtctc  |
| PRKCB1   | NP_002729 | NM_002738 | gattctgagggacacatcaag  | atccttgaattctgattggtc  |
| PRKCABP  | NP_036539 | NM_012407 | atcgagaagttcggcattcgg  | tcaggagtcacaccagcttc   |
| PRKCE    | NP_005391 | NM_005400 | cttctggatgcagaaggtcac  | ggcatcaggtcttccacaaag  |
| PRKCA    | NP_002728 | NM_002737 | attgctgacttgggatgtgc   | tactgcactctgtaagatggg  |
| PRKCDBP  | NP_659477 | NM_145040 | acaccaccagcaacaccttg   | tcaggctacactctcatttg   |
| PRKCG    | NP_002730 | NM_002739 | ttggcatgtgaaggagaacg   | tacatgacgggcacaggcac   |
| PRKCZ    | NP_002735 | NM_002744 | actacggcatgtgcaagggaag | cctcgggtggacagcaataatg |
| RACGAP1  | NP_037409 | NM_013277 | tgaccttcgccttaacagag   | tcacttgagcattggagaagc  |
| RAC2     | NP_002863 | NM_002872 | atgcaggccatcaagtggtg   | ctagaggaggctcagggcg    |
| ARHGEF7  | NP_003890 | NM_003899 | agcctccgaaaacacccaag   | atagattggtctatcccagg   |
| ARHGAP30 | NP_859071 | NM_181720 | gtctatgccctgttctcttg   | tcacagtccttccacttccc   |
| RAP1GDS1 | NP_006982 | NM_021159 | tctgaaatgcactcctgttcag | cagcttccacagtaagtctc   |
| CDC42    | NP_426359 | NM_044472 | ttaagtgtgttggggcg      | acagcactcctttgggttg    |
| KRAS     | NP_203524 | NM_033360 | aacttgtgtagttggagctg   | attttcacacagccaggagtc  |
| KRAS     | NP_004976 | NM_004985 | aacttgtgtagttggagctg   | ttacacacttcttctgacttc  |
| HRAS     | NP_005334 | NM_005343 | tgacggaataaagctggtgg   | agcacacactgcagctcatg   |
| PRDX6    | NP_004896 | NM_004905 | cgacttctgggagactcatg   | gggtgtagcggagggtattc   |
| COVA1    | NP_006366 | NM_006375 | aggaagaaaatgacagcctcc  | ttaggtcagctcaagccctc   |
| TXNL4    | XP_371120 | XM_371120 | tgctgacatgctcccgcac    | tagcggtagcttgggtgtag   |
| FLJ10094 | NP_060463 | NM_017993 | atgaggtggagctgtaaac    | ccttcaaaggcacacaactc   |

**All Nested Primers Start with the following sequence: gcgtaatacagactcactatagg**

| Gene Name | Protein Accession | Nucleotide Acc | Nested primer Forward<br>gcgtaatacagactcactatagg+ | Nested primer Backward<br>gcgtaatacagactcactatagg+ |
|-----------|-------------------|----------------|---------------------------------------------------|----------------------------------------------------|
| SYTL1     | NP_116261         | NM_032872      | acgtgggactggggctc                                 | ccatccaccattcgcac                                  |
| CYBB      | NP_000388         | NM_000397      | aagatagcgggtgatggc                                | gactcagagttggagatgc                                |
| NCF1      | NP_000256         | NM_000265      | aaagcaaaagcagggctgg                               | ctgcagcggttcaggatg                                 |
| CYBA      | NP_000092         | NM_000101      | tccggcctgatcctcatc                                | accgggatggggttgac                                  |
| LOC401374 | XP_376628         | XM_376628      | aaagcaaaagcagggctgg                               | ctgcagcggttcaggatg                                 |
| NOXO1     | NP_751907         | NM_172167      | agggagcctggacgtg                                  | tccagggccctgcgtg                                   |
| LOC283247 | XP_208058         | XM_208058      | accaaagcaacattgggg                                | gatagtgaaattgggtccac                               |
| DUOX2     | NP_054799         | NM_014080      | accttgatggaccgttgg                                | ctgtgacgagctgacag                                  |
| RUFY1     | NP_079434         | NM_025158      | ctgcagctgcagctctc                                 | ttgggttaggagggcag                                  |
| DUOX1     | NP_059130         | NM_017434      | agctgtaccttgatggacc                               | tgccgttgatgagctgac                                 |
| NOX5      | NP_078781         | NM_024505      | accccccttgcctcattc                                | tgccccctcagcaccttg                                 |
| NOX3      | NP_056533         | NM_015718      | tcactaccagtggtgtg                                 | gctgatgaatacaagtggg                                |
| ARHGDIB   | NP_001166         | NM_001175      | gaggaggatgacgatgatg                               | tgagggtgcttctgtctc                                 |
| NOX4      | NP_058627         | NM_016931      | agactccgaaattctgcc                                | tgatagtgaaattgggtcc                                |
| ARHGDI A  | NP_004300         | NM_004309      | gaagagatccaggagatc                                | atggtgagattccactccc                                |
| NOXA1     | NP_006638         | NM_006647      | ctggtgactgcaccgtg                                 | ggctcctgacatccgag                                  |
| NOX1      | NP_008983         | NM_007052      | gccagtgaggatgtttcc                                | atcggtgacagcatttgcg                                |
| PRDX2     | NP_859428         | NM_181738      | ctgactcaaggccacag                                 | tttccagatgggaaaacgc                                |
| PRDX2     | NP_859427         | NM_181737      | ctgactcaaggccacag                                 | gggcttaatcgtgtcactg                                |
| PRDX1     | NP_859048         | NM_181697      | cccaactcaaagccacag                                | tgatggtatcactgccagg                                |
| PRDX1     | NP_859047         | NM_181696      | cccaactcaaagccacag                                | tgatggtatcactgccagg                                |
| PRDX5     | NP_857635         | NM_181652      | cggtcagctgcggcag                                  | gccatctggttccacattc                                |
| PRDX3     | AAH59169          | BC059169       | acagccgttgcaatggag                                | gacttggctgatcgtagg                                 |
| PRDX4     | AAH03609          | BC003609       | tactgggaaggaacagctg                               | tactaccaggttccagc                                  |
| TXN2      | NP_036605         | NM_012473      | ctctgtcatctccaggaag                               | ctccaactgatcctcctc                                 |
| TXNRD2    | NP_006431         | NM_006440      | cgacactcagaagatcctg                               | tacctctcagagcatgtg                                 |
| TXNRD2    | NP_665691         | NM_145748      | cgacactcagaagatcctg                               | tacctctcagagcatgtg                                 |
| TXN       | NP_003320         | NM_003329      | gactgctttcaggaagcc                                | ggctccagaaaattccacc                                |

|           |           |           |                      |                      |
|-----------|-----------|-----------|----------------------|----------------------|
| TXNRD1    | NP_877393 | NM_182729 | cctgtcacagatgaagaac  | atacctctgcacagacagg  |
| TXNL2     | NP_006532 | NM_006541 | ggaactcctcaagaaccac  | cacaatatccaatcctccc  |
| TXNL1     | NP_004777 | NM_004786 | agaaaatgacctggaagc   | ttgttgctggactggag    |
| TXNDC9    | NP_005774 | NM_005783 | gaaaagagactccaggcac  | ttggtctgaaatggtggc   |
| TXNDC     | NP_110382 | NM_030755 | actgagtgacggtttacc   | gagagcgtgtcttatggc   |
| TXNDC3    | NP_057700 | NM_016616 | ctgggaccaagaactgtg   | cataggcgttagatgctcc  |
| TXNDC2    | NP_115619 | NM_032243 | agggtgacattccaagtc   | caaagttcatccacctttc  |
| PTGES2    | NP_945177 | NM_198939 | cctggcctggaggctg     | ggagaactgatctcagcc   |
| TXNRD3    | XP_051264 | XM_051264 | gagaagagtgaaaaatacc  | ccaaagtcgtgaaccacct  |
| PRDX5     | NP_857634 | NM_181651 | cggtcagctgcggcag     | gccatctggtccacattc   |
| GLRX2     | NP_057150 | NM_016066 | ggatgtttacacgtgggtg  | gcctatgagtgtagtgc    |
| PRDX5     | NP_036226 | NM_012094 | tccgcagtttcagcagag   | gccatctggtccacattc   |
| TXNL2     | NP_006532 | NM_006541 | ggaactcctcaagaaccac  | cacaatatccaatcctccc  |
| GLRX      | NP_002055 | NM_002064 | caaaatccagcctgggaag  | tccccactctgttgcaag   |
| LOC392531 | XP_373367 | XM_373367 | ttcagcaacgcatgggtg   | tcagttctccaccagacc   |
| LOC389207 | XP_371694 | XM_371694 | gccagtgagaagggtttg   | tgcaagccgtacactcag   |
| C14orf87  | NP_057501 | NM_016417 | agctgcgggcgtctg      | catctaaaagggcggagtg  |
| SH3BGRL3  | NP_112576 | NM_031286 | tgggaagcgcatccaatac  | ctcgagcgtgtttgttcc   |
| GLRX2     | NP_932066 | NM_197962 | gcaggctgcttgacag     | gcctatgagtgtagtgc    |
| GPX6      | NP_874360 | NM_182701 | gcaacaaagggtaacagg   | gtctgactgactgtgctg   |
| GPX1      | NP_000572 | NM_000581 | gggagcctgtgagcctg    | aatggtctggaagcgcg    |
| GPX1      | NP_958799 | NM_201397 | gggagcctgtgagcctg    | aagccgagcaccaccag    |
| LOC389839 | XP_372197 | XM_372197 | gggagcctgtgagcctg    | agaccaggtgatgacttg   |
| GPX7      | NP_056511 | NM_015696 | gcaggacttctacgacttc  | atgagcttctcagcagc    |
| GPX3      | NP_002075 | NM_002084 | gcaccattacgagtagcg   | cctcatgtaggacaggatg  |
| GPX4      | NP_002076 | NM_002085 | tgctctggtgggctctg    | cttctatcaccagggg     |
| GPX2      | AAH67221  | BC067221  | ctatgacctcagtgccatc  | ggtgatggtgggaaggtg   |
| GPX5      | NP_001500 | NM_001509 | ggattgccacaaagacgag  | gtctgtctgactgagctg   |
| GPX7      | AAH32788  | BC032788  | gcaggacttctacgacttc  | atgagcttctcagcagc    |
| GPX5      | NP_003987 | NM_003996 | cttctcctgacgcttctg   | ctaggtaaaaatcctcccc  |
| CAT       | NP_001743 | NM_001752 | aacatgccacctggcattg  | agatccggactgcacaaag  |
| LOXHD1    | NP_653213 | NM_144612 | ggcccaattattccctac   | tggtggaaggaagagtg    |
| ALOX5AP   | NP_001620 | NM_001629 | atcagcgtggtccagaatg  | ggtggagatcgttttatg   |
| ALOXE3    | NP_067641 | NM_021628 | cgtdggctactattatccc  | aatgaggggaggggtccag  |
| ALOX15B   | NP_001132 | NM_001141 | tcatcggatctactacc    | aggggtcaggttaggttag  |
| ALOX5     | NP_000689 | NM_000698 | accaggtggtgaggag     | tggcagctgttcttctg    |
| ALOX12B   | NP_001130 | NM_001139 | tgtgacggagatcatcacc  | caggtagtagtaggggatg  |
| ALOX12    | NP_000688 | NM_000697 | gatcgtccaccttctctac  | catagggccagtcagggtg  |
| PTGS2     | NP_000954 | NM_000963 | gttctggtggttaggaatg  | tatcatctagtcggagcg   |
| PTGS1     | NP_000953 | NM_000962 | caacacctcatgttggtg   | catcatcctgactggcatc  |
| PTGS1     | NP_542158 | NM_080591 | gccatggagttcaaccatc  | catcatcctgactggcatc  |
| PRKCI     | NP_002731 | NM_002740 | caggagatacaaccagcac  | ccttcaaattcagactgatc |
| PRKCQ     | NP_006248 | NM_006257 | gttaggagatccaagacg   | ctggtccatgctgtgatc   |
| PRK3      | NP_005804 | NM_005813 | catcagcagagccatttcc  | gcatgtatttcccagcggag |
| PRKCH     | NP_006246 | NM_006255 | tggcagactcggaatgtg   | agtttcaaactcatcctgtg |
| PRKCD     | NP_997704 | NM_212539 | gaacatattcggggagagc  | gggggtcacaaaggaagaag |
| PRKCB1    | NP_997700 | NM_212535 | ggaaaacatctgggatggg  | ggtccaagttcatgatgaag |
| PRKCD     | NP_006245 | NM_006254 | gaacatattcggggagagc  | gggggtcacaaaggaagaag |
| PRKCB1    | NP_002729 | NM_002738 | ggaaaacatctgggatggg  | tcctgatgacttctggtc   |
| PRKCABP   | NP_036539 | NM_012407 | aaccatcaagccgatgctg  | agcagcccctcgtgtatc   |
| PRKCE     | NP_005391 | NM_005400 | tgacttcgggatgtgcaag  | ttcctcctggttgatctgc  |
| PRKCA     | NP_002728 | NM_002737 | catgatggatggagtcacg  | aactgggggttgacatacg  |
| PRKCDBP   | NP_659477 | NM_145040 | tgagctgcacgccaac     | gagcagagcttctcgggc   |
| PRKCG     | NP_002730 | NM_002739 | acgacaacccgcaccttc   | atccgggtgcacgaagtc   |
| PRKCZ     | NP_002735 | NM_002744 | cacaacgagcactttctgc  | agcctcgaactctgactg   |
| RACGAP1   | NP_037409 | NM_013277 | tggaaagcagcagaaatcac | agttgcctgtcgtcctag   |
| RAC2      | NP_002863 | NM_002872 | caagacctgcctctcatc   | gcttctgctgccgctg     |
| ARHGEF7   | NP_003890 | NM_003899 | ccctggagcctgagctg    | cttcaggacttctcacc    |
| ARHGAP30  | NP_859071 | NM_181720 | atgctgtagctccactc    | gcatatgatctgcgctgag  |
| RAP1GDS1  | NP_066982 | NM_021159 | aatagatgcacaagaagctg | ctgctgggcaacactttg   |
| CDC42     | NP_426359 | NM_044472 | gtctcctgatctctacac   | cagctaggatagcctcatc  |
| KRAS      | NP_203524 | NM_033360 | taggcaagagtgcttgac   | ctgtattgtcggatctccc  |
| KRAS      | NP_004976 | NM_004985 | taggcaagagtgcttgac   | ccatcttgtcatcttttc   |
| HRAS      | NP_005334 | NM_005343 | aagagtcgctgacctc     | actctcatcaggagggttc  |
| PRDX6     | NP_004896 | NM_004905 | attctcttccccacctc    | agatggggagctcttgggtg |
| COVA1     | NP_006366 | NM_006375 | gatgcctaccggaatgaag  | ccatcttcttccaggctg   |
| TXNL4     | XP_371120 | XM_371120 | tgcaaacgctggtgag     | tccttgggggacaccac    |
| FLJ10094  | NP_060463 | NM_017993 | gaaaacctcacaaggacc   | ctttttccagctggctc    |
