# Supplementary material
Source: PubMed Central journal article supplement (PMC2916958)
Supplement: NIHMS194498-supplement-3.pdf [file NIHMS194498-supplement-3.pdf]

# Supplementary Information for Figure 4: Complete Western Blots

## Complete Western Blot Figure 4 A pAKT, AKT, pERK and ERK

700 Channel

800 Channel

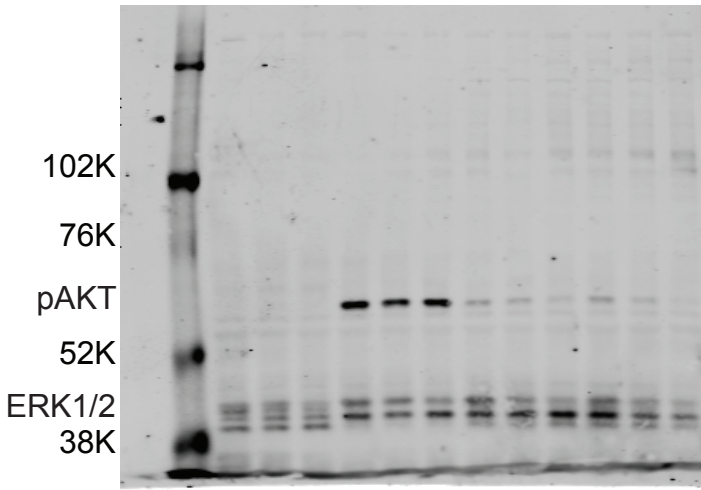

|          |   |   |   |    |    |    |   |   |   |   |   |   |
|----------|---|---|---|----|----|----|---|---|---|---|---|---|
| PDGF(hr) | 0 | 0 | 0 | .5 | .5 | .5 | 6 | 6 | 6 | 9 | 9 | 9 |
| siRNA:   |   |   |   |    |    |    |   |   |   |   |   |   |
| NOX4     | - | + | - | -  | +  | -  | - | + | - | - | + | - |
| DUOX2    | - | - | + | -  | -  | +  | - | - | + | - | - | + |
| (-) CTRL | + | - | - | +  | -  | -  | + | - | - | + | - | - |

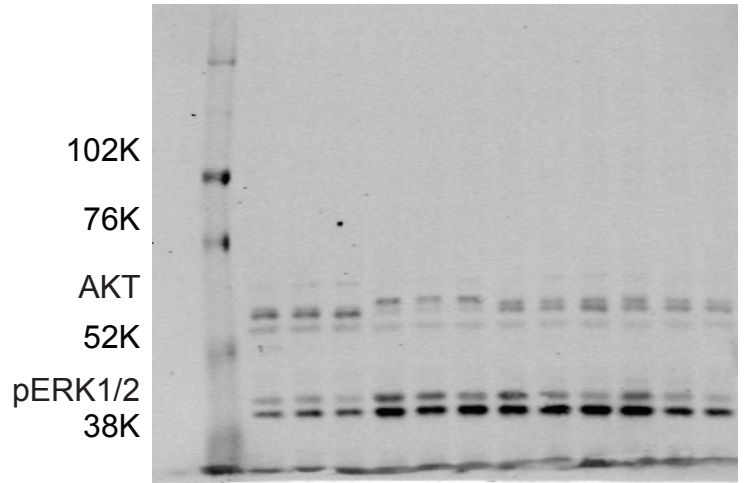

|          |   |   |   |    |    |    |   |   |   |   |   |   |
|----------|---|---|---|----|----|----|---|---|---|---|---|---|
| PDGF(hr) | 0 | 0 | 0 | .5 | .5 | .5 | 6 | 6 | 6 | 9 | 9 | 9 |
| siRNA:   |   |   |   |    |    |    |   |   |   |   |   |   |
| NOX4     | - | + | - | -  | +  | -  | - | + | - | - | + | - |
| DUOX2    | - | - | + | -  | -  | +  | - | - | + | - | - | + |
| (-) CTRL | + | - | - | +  | -  | -  | + | - | - | + | - | - |

## Complete Western Blot Figure 4A with GAPDH

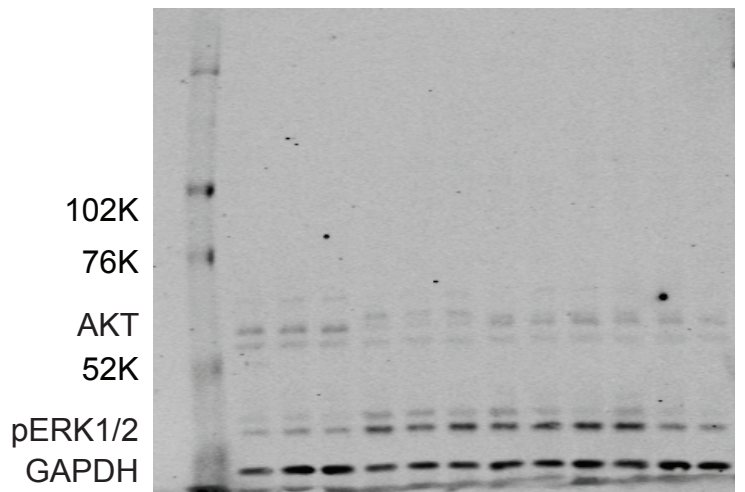

|          |   |   |   |    |    |    |   |   |   |   |   |   |
|----------|---|---|---|----|----|----|---|---|---|---|---|---|
| PDGF(hr) | 0 | 0 | 0 | .5 | .5 | .5 | 6 | 6 | 6 | 9 | 9 | 9 |
| siRNA:   |   |   |   |    |    |    |   |   |   |   |   |   |
| NOX4     | - | + | - | -  | +  | -  | - | + | - | - | + | - |
| DUOX2    | - | - | + | -  | -  | +  | - | - | + | - | - | + |
| (-) CTRL | + | - | - | +  | -  | -  | + | - | - | + | - | - |

# Complete Western Blots Figure 4 C-F

700 Channel

800 Channel

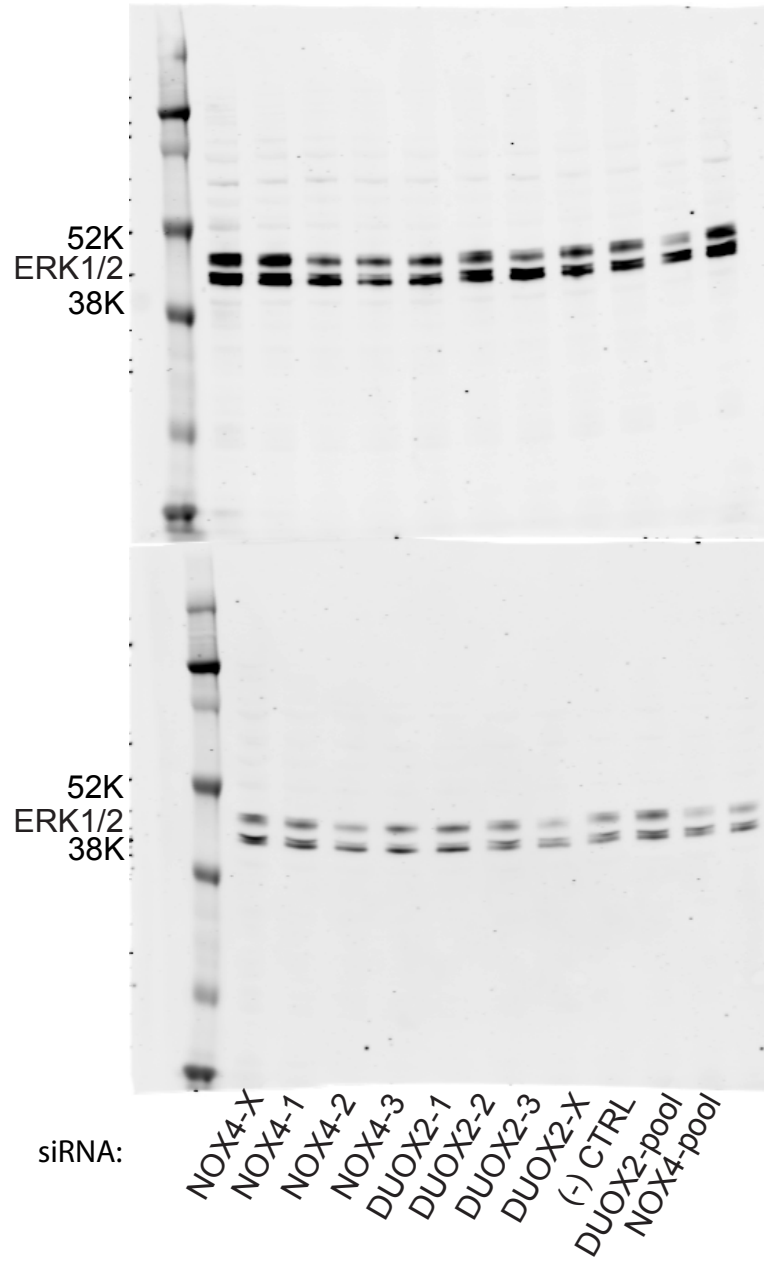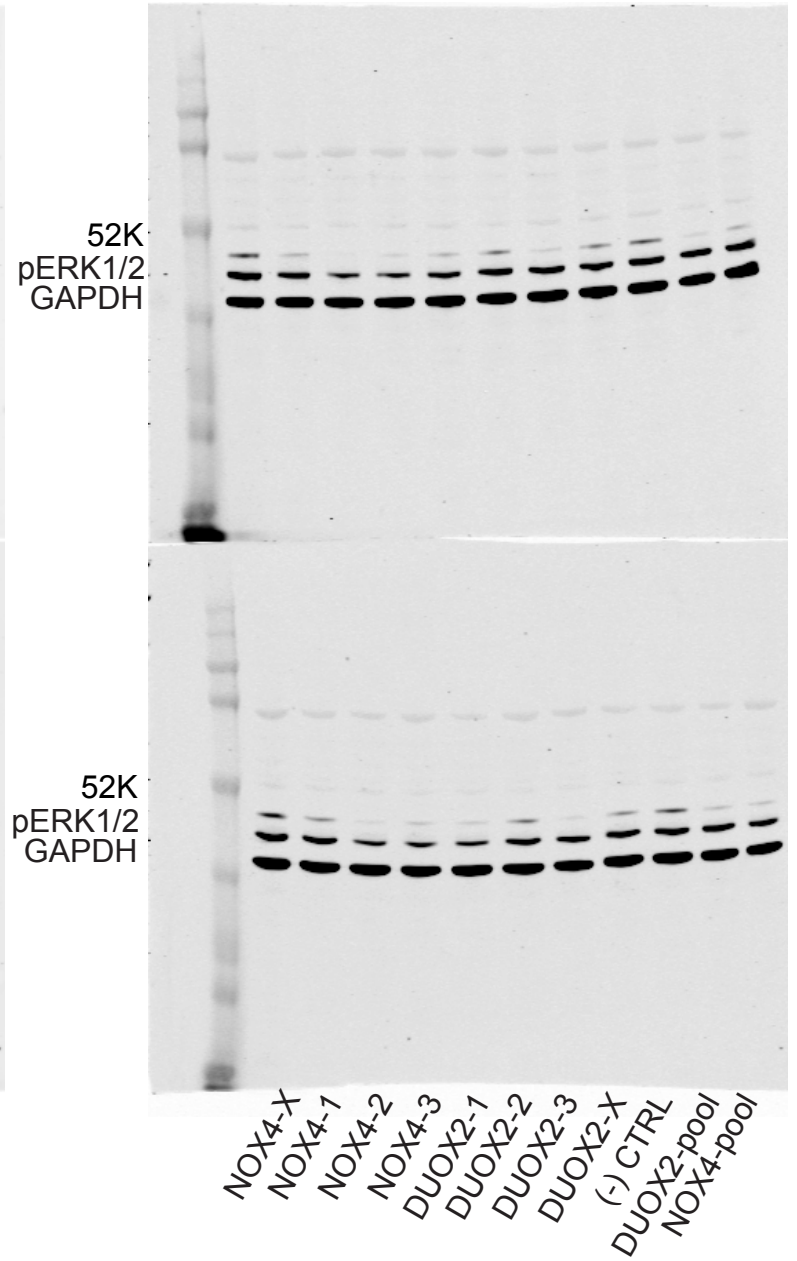

siRNA:

NOX4-X  
NOX4-1  
NOX4-2  
NOX4-3  
DUOX2-1  
DUOX2-2  
DUOX2-3  
(-) CTRL  
DUOX2-pool  
NOX4-pool

NOX4-X  
NOX4-1  
NOX4-2  
NOX4-3  
DUOX2-1  
DUOX2-2  
DUOX2-3  
(-) CTRL  
DUOX2-pool  
NOX4-pool

# Complete Western Blots Figure 4 C-F

700 Channel

800 Channel

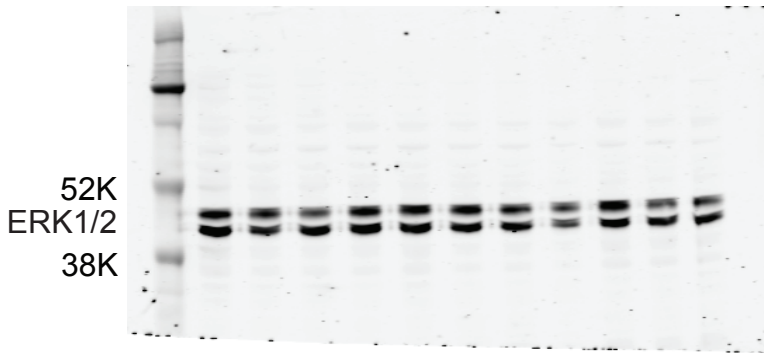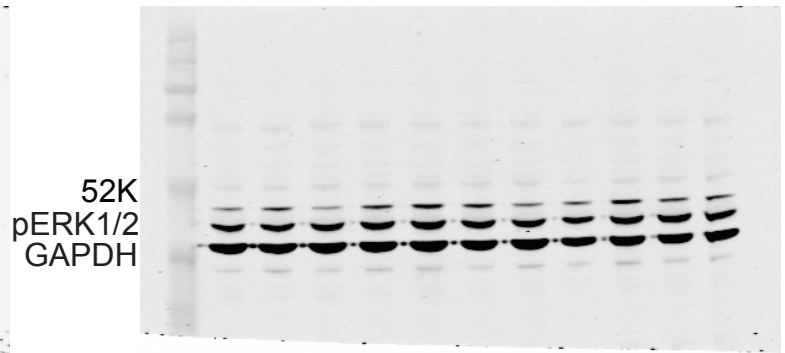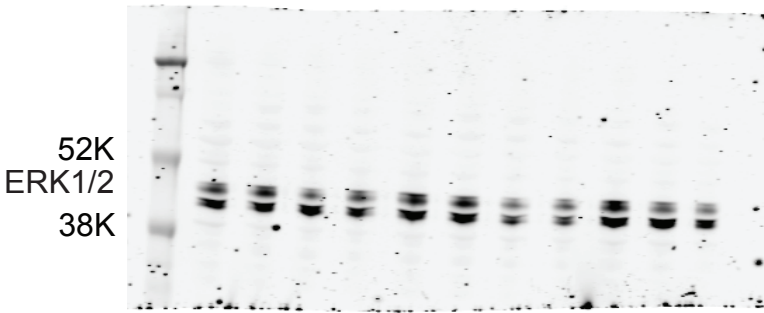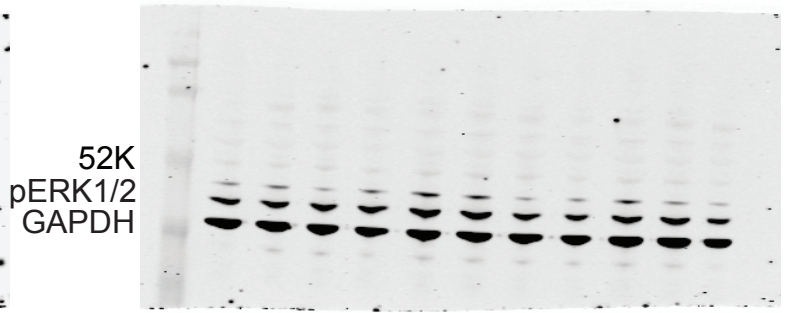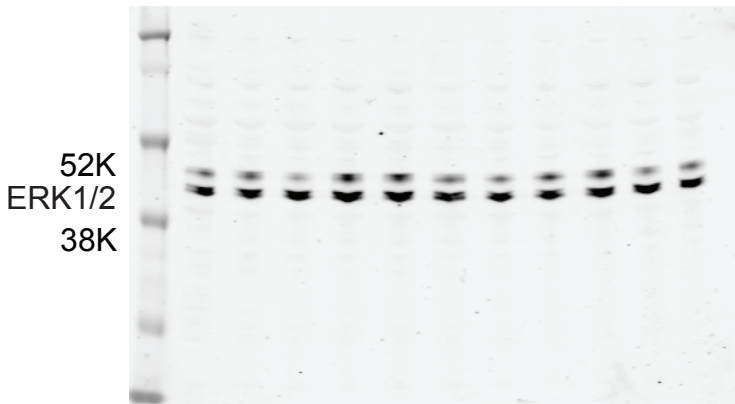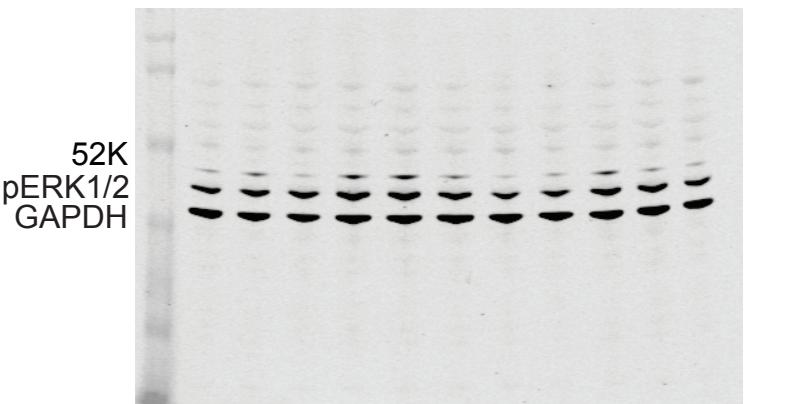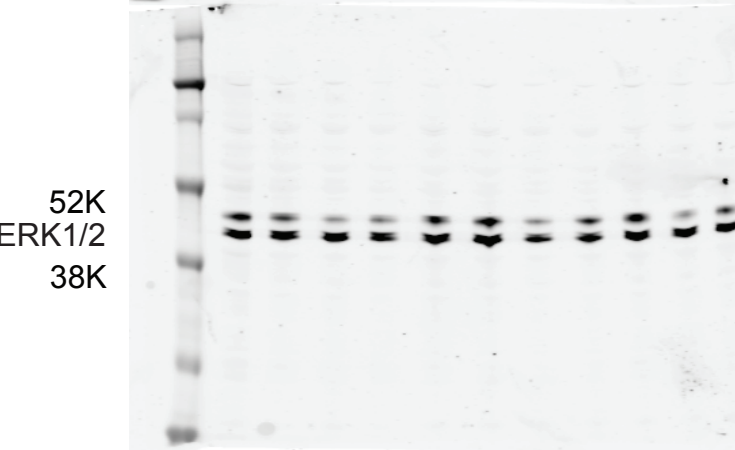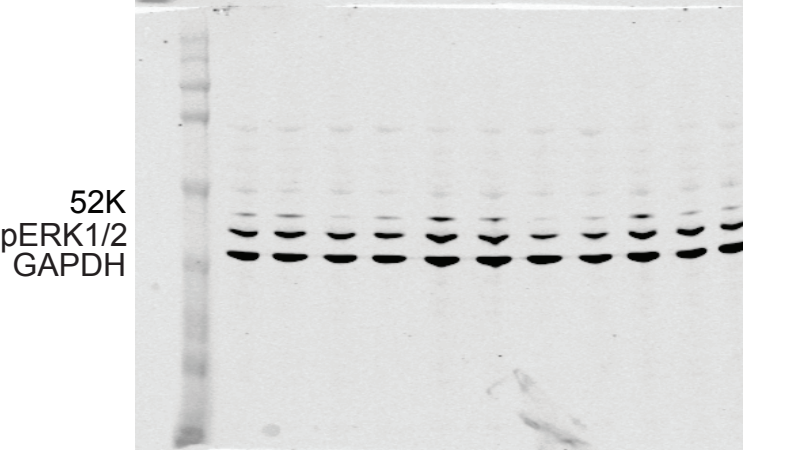

siRNA:

DUOX2-1  
DUOX2-2  
DUOX2-3  
DUOX2-X  
NOX4-X  
NOX4-1  
NOX4-2  
NOX4-3  
(-) CTRL  
DUOX2-pool  
NOX4-pool

DUOX2-1  
DUOX2-2  
DUOX2-3  
DUOX2-X  
NOX4-X  
NOX4-1  
NOX4-2  
NOX4-3  
(-) CTRL  
DUOX2-pool  
NOX4-pool
