# Supplementary material
Source: PubMed Central journal article supplement (PMC2916958)
Supplement: NIHMS194498-supplement-4.pdf [file NIHMS194498-supplement-4.pdf]

# Complete Western Blots Figure 4 G

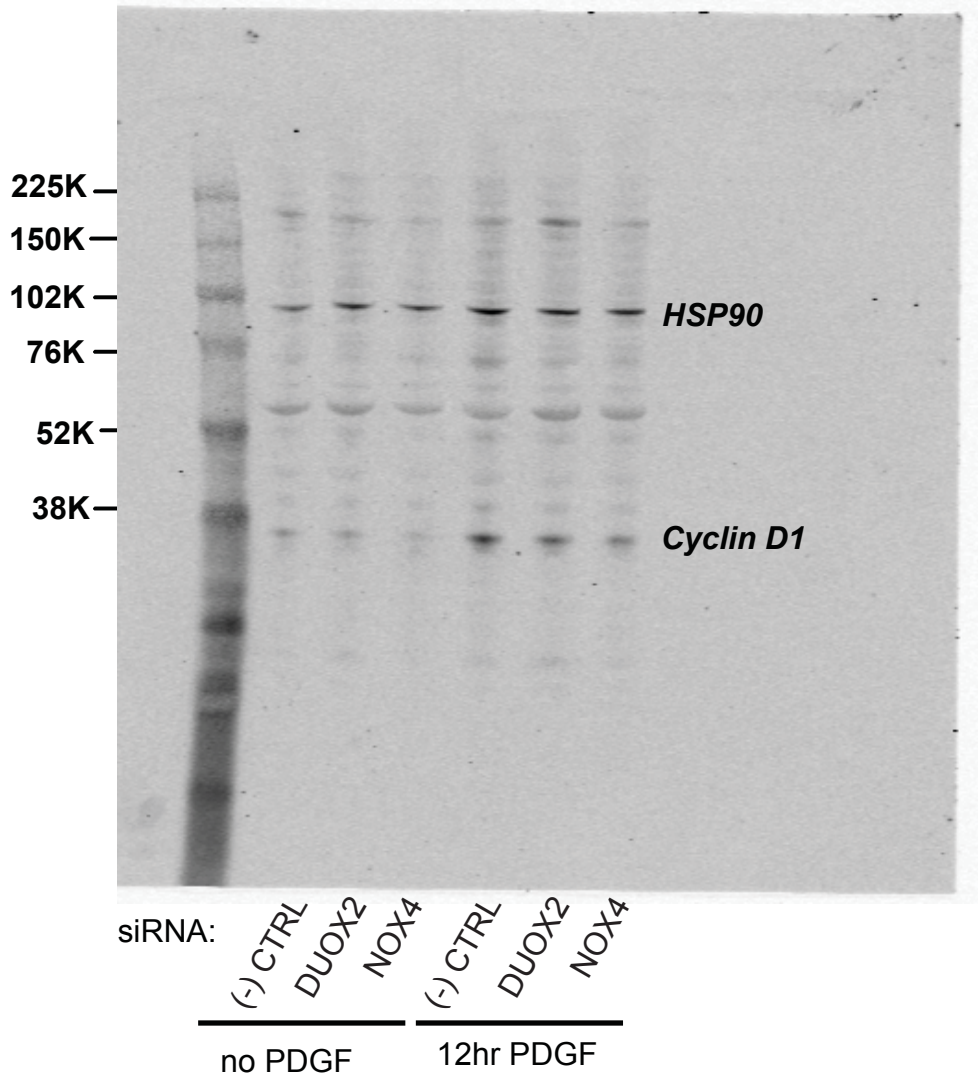

# Complete Western Blot Supplementary Figure 2a

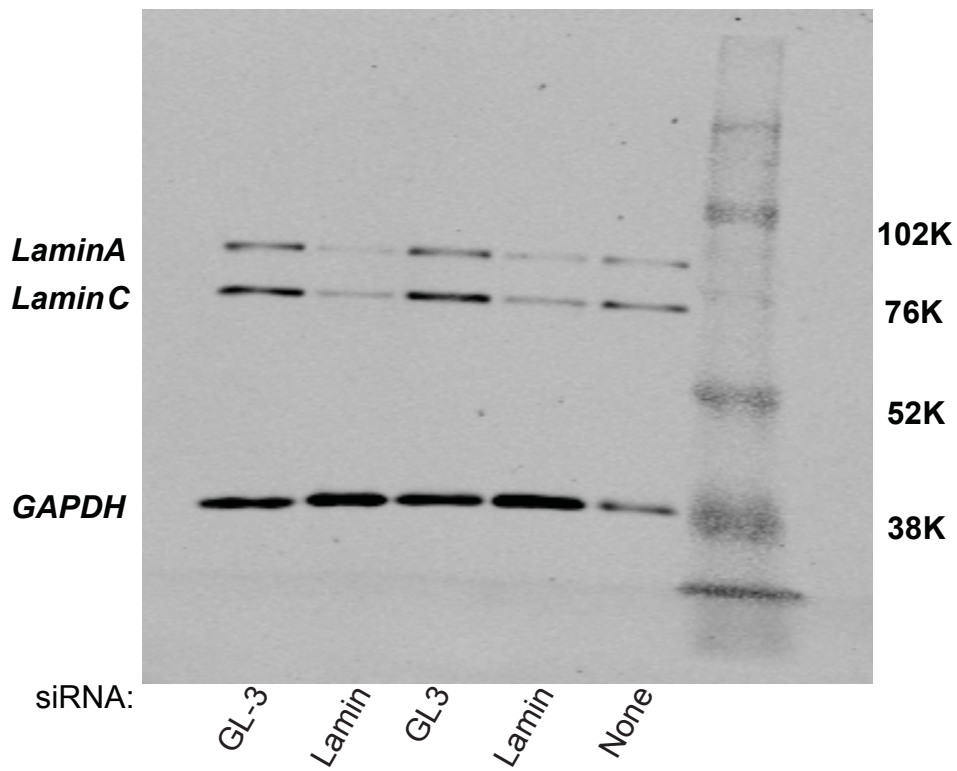

# Complete Western Blot Supplementary Figure 3a

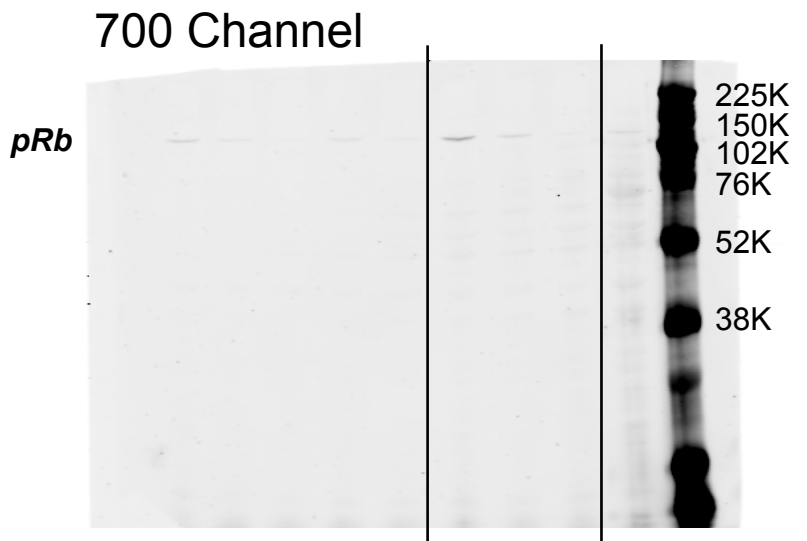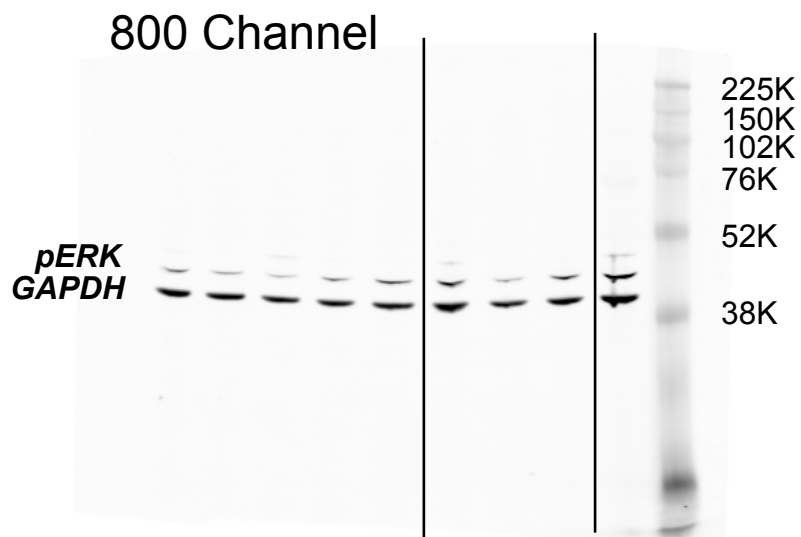

(-) CTRL  
NOX4  
DUOX2

27 Hours PDGF
